# Supplementary material for: Comparative Analysis of Mitogenomes of Chironomus (Diptera: Chironomidae)
Source: MDPI journal article supplement (doi:10.3390/insects13121164), 2022-12-16
Supplement: s1 [file s1]

## Supplementary materials

**Table S1. The best model for each partition of the five datasets.**

| Datasets | Partition names                                                                             | Best model |
|----------|---------------------------------------------------------------------------------------------|------------|
| PCG123   | CO3_pos1, CO1_pos1, ATP6_pos1, CytB_pos1, CO2_pos1                                          | GTR+I+G    |
|          | CO3_pos2, CO2_pos2, CO1_pos2, ATP6_pos2                                                     | F81+I      |
|          | ATP6_pos3, ND3_pos3, CytB_pos3, CO3_pos3, ATP8_pos3, CO2_pos3                               | HKY+I+G    |
|          | ATP8_pos2, ATP8_pos1, ND6_pos1                                                              | HKY+I+G    |
|          | CO1_pos3, ND2_pos3, ND6_pos3                                                                | HKY+G      |
|          | ND4L_pos2, ND4L_pos1, CytB_pos2, ND1_pos2, ND3_pos2, ND4_pos2, ND6_pos2, ND5_pos2, ND2_pos2 | GTR+I+G    |
|          | ND3_pos1, ND2_pos1, ND1_pos1, ND5_pos1, ND4_pos1                                            | GTR+I+G    |
|          | ND4L_pos3, ND4_pos3, ND1_pos3, ND5_pos3                                                     | GTR+G      |
| PCG12R   | 16S, 12S                                                                                    | HKY+G      |
|          | ATP6, CO1, CO2, CytB, CO3                                                                   | GTR+I+G    |
|          | ATP8, ND2, ND6                                                                              | HKY+I+G    |
|          | ND4L, ND1, ND3, ND5, ND4                                                                    | GTR+I+G    |
| PCG123R  | 16S, 12S                                                                                    | HKY+G      |
|          | CO3_pos1, CO1_pos1, ATP6_pos1, CO2_pos1, CytB_pos1                                          | GTR+I+G    |
|          | CO2_pos2, CO3_pos2, ATP6_pos2, CO1_pos2                                                     | F81+I      |
|          | CO3_pos3, CytB_pos3, CO2_pos3, ATP8_pos3, ATP6_pos3, ND2_pos3, ND6_pos3                     | HKY+I+G    |
|          | ATP8_pos2, ATP8_pos1, ND6_pos1                                                              | HKY+I+G    |
|          | CO1_pos3, ND3_pos3                                                                          | HKY+G      |
|          | ND4L_pos1, ND4L_pos2, CytB_pos2, ND3_pos2, ND1_pos2, ND4_pos2, ND6_pos2, ND2_pos2, ND5_pos2 | GTR+I+G    |
|          | ND1_pos1, ND5_pos1, ND4_pos1, ND2_pos1, ND3_pos1                                            | GTR+I+G    |
|          | ND4L_pos3, ND1_pos3, ND4_pos3, ND5_pos3                                                     | GTR+G      |
| AA       | CO1, CO2, ND4L, ATP6                                                                        | MTMAM+I+G  |
|          | ATP8, ND6                                                                                   | MTREV+I+G  |
|          | CO3, ND2, ND3, ND4, CytB, ND1                                                               | MTMAM+I+G  |
|          | ND5                                                                                         | MTMAM+I+G  |

**Table S2. Nucleotide composition of mitochondrial genomes of 15 *Chironomus* species.**

|         | Species                          | Whole Genome | Protein Coding Genes | 1 <sup>st</sup> Codon Position | 2 <sup>nd</sup> Codon Position | 3 <sup>rd</sup> Codon Position | tRNA Genes | 12S rRNA | 16S rRNA | Control Region |
|---------|----------------------------------|--------------|----------------------|--------------------------------|--------------------------------|--------------------------------|------------|----------|----------|----------------|
| A+T %   | <i>Chironomus anthracinus</i>    | 75.31        | 71.66                | 66.81                          | 67.69                          | 80.46                          | 78.85      | 82.89    | 84.35    | 91.29          |
|         | <i>Chironomus nipponensis</i>    | 76.13        | 72.68                | 67.93                          | 67.80                          | 82.31                          | 79.13      | 82.95    | 84.79    | 92.11          |
|         | <i>Chironomus flaviplumus</i>    | 78.47        | 76.00                | 69.13                          | 67.72                          | 91.15                          | 79.21      | 83.25    | 84.88    | 95.38          |
|         | <i>Chironomus plumosus</i>       | 76.20        | 72.93                | 67.74                          | 67.66                          | 83.38                          | 79.43      | 83.99    | 84.89    | 92.81          |
|         | <i>Chironomus tentans</i>        | 76.94        | 74.06                | 68.17                          | 67.85                          | 86.16                          | 79.44      | 82.82    | 85.24    | 93.57          |
|         | <i>Chironomus novosibiricus</i>  | 76.19        | 72.72                | 67.58                          | 67.56                          | 83.03                          | 79.13      | 82.80    | 85.18    | 93.36          |
|         | <i>Chironomus annularius</i>     | 75.56        | 72.33                | 67.91                          | 67.75                          | 81.33                          | 79.10      | 83.07    | 84.70    | 91.90          |
|         | <i>Chironomus agilis</i>         | 75.64        | 72.34                | 67.44                          | 67.79                          | 81.80                          | 79.17      | 82.97    | 85.01    | 92.40          |
|         | <i>Chironomus nippodorsalis</i>  | 76.40        | 73.40                | 68.12                          | 67.85                          | 84.23                          | 79.16      | 83.54    | 84.73    | 92.32          |
|         | <i>Chironomus tepperi</i>        | 76.92        | 74.33                | 67.75                          | 67.67                          | 87.58                          | 79.02      | 82.60    | 84.30    | 93.00          |
|         | <i>Chironomus claggi</i>         | 77.83        | 75.26                | 68.76                          | 67.88                          | 89.15                          | 79.08      | 82.74    | 84.52    | 94.29          |
|         | <i>Chironomus kiiensis</i>       | 76.94        | 74.21                | 71.88                          | 67.99                          | 82.75                          | 79.23      | 82.72    | 84.66    | 90.87          |
|         | <i>Chironomus transvaalensis</i> | 78.54        | 75.92                | 69.24                          | 67.82                          | 90.70                          | 79.88      | 83.42    | 85.57    | 95.96          |
|         | <i>Chironomus circumdatus</i>    | 78.44        | 75.87                | 69.27                          | 67.72                          | 90.62                          | 79.71      | 83.15    | 85.15    | 94.75          |
|         | <i>Chironomus javanus</i>        | 77.37        | 74.57                | 68.04                          | 67.93                          | 87.73                          | 79.59      | 82.97    | 85.03    | 95.15          |
| AT-skew | <i>Chironomus anthracinus</i>    | 0.03         | -0.20                | -0.08                          | -0.40                          | -0.14                          | 0.03       | -0.01    | 0.00     | -0.09          |
|         | <i>Chironomus nipponensis</i>    | 0.03         | -0.20                | -0.09                          | -0.40                          | -0.13                          | 0.04       | 0.01     | 0.01     | -0.10          |
|         | <i>Chironomus flaviplumus</i>    | 0.01         | -0.20                | -0.10                          | -0.40                          | -0.11                          | 0.02       | 0.00     | 0.03     | -0.03          |
|         | <i>Chironomus plumosus</i>       | 0.03         | -0.20                | -0.08                          | -0.40                          | -0.13                          | 0.03       | 0.02     | 0.00     | -0.06          |

|         |                                  |       |       |       |       |       |      |       |       |       |
|---------|----------------------------------|-------|-------|-------|-------|-------|------|-------|-------|-------|
|         | <i>Chironomus tentans</i>        | 0.02  | -0.19 | -0.09 | -0.40 | -0.10 | 0.04 | 0.01  | 0.02  | -0.06 |
|         | <i>Chironomus novosibiricus</i>  | 0.03  | -0.20 | -0.09 | -0.40 | -0.13 | 0.05 | 0.01  | 0.01  | -0.07 |
|         | <i>Chironomus annularius</i>     | 0.03  | -0.20 | -0.09 | -0.40 | -0.12 | 0.03 | 0.02  | 0.01  | -0.09 |
|         | <i>Chironomus agilis</i>         | 0.03  | -0.20 | -0.08 | -0.40 | -0.12 | 0.04 | 0.01  | 0.01  | -0.10 |
|         | <i>Chironomus nippodorsalis</i>  | 0.02  | -0.19 | -0.09 | -0.41 | -0.10 | 0.04 | 0.02  | 0.00  | -0.06 |
|         | <i>Chironomus tepperi</i>        | 0.02  | -0.19 | -0.09 | -0.40 | -0.12 | 0.04 | 0.01  | 0.00  | -0.10 |
|         | <i>Chironomus claggi</i>         | 0.01  | -0.19 | -0.10 | -0.40 | -0.11 | 0.03 | -0.01 | -0.01 | -0.10 |
|         | <i>Chironomus kiiensis</i>       | 0.02  | -0.18 | -0.08 | -0.36 | -0.13 | 0.04 | 0.01  | -0.02 | -0.10 |
|         | <i>Chironomus transvaalensis</i> | 0.01  | -0.19 | -0.10 | -0.40 | -0.11 | 0.04 | 0.00  | 0.01  | -0.12 |
|         | <i>Chironomus circumdatus</i>    | 0.01  | -0.20 | -0.10 | -0.40 | -0.13 | 0.04 | 0.00  | 0.01  | -0.07 |
|         | <i>Chironomus javanus</i>        | 0.01  | -0.20 | -0.08 | -0.40 | -0.14 | 0.03 | 0.01  | 0.00  | -0.11 |
| GC-skew | <i>Chironomus anthracinus</i>    | -0.20 | -0.04 | 0.15  | -0.17 | -0.18 | 0.13 | 0.36  | 0.39  | -0.23 |
|         | <i>Chironomus nipponensis</i>    | -0.21 | -0.02 | 0.19  | -0.18 | -0.13 | 0.12 | 0.37  | 0.37  | -0.35 |
|         | <i>Chironomus flaviplumus</i>    | -0.17 | 0.01  | 0.23  | -0.18 | -0.03 | 0.15 | 0.36  | 0.36  | -0.25 |
|         | <i>Chironomus plumosus</i>       | -0.23 | -0.04 | 0.17  | -0.18 | -0.18 | 0.14 | 0.33  | 0.39  | -0.55 |
|         | <i>Chironomus tentans</i>        | -0.21 | -0.04 | 0.18  | -0.18 | -0.22 | 0.12 | 0.36  | 0.38  | -0.50 |
|         | <i>Chironomus novosibiricus</i>  | -0.19 | -0.03 | 0.18  | -0.17 | -0.15 | 0.11 | 0.35  | 0.36  | -0.29 |
|         | <i>Chironomus annularius</i>     | -0.22 | -0.02 | 0.19  | -0.18 | -0.10 | 0.13 | 0.35  | 0.39  | -0.32 |
|         | <i>Chironomus agilis</i>         | -0.22 | -0.05 | 0.15  | -0.18 | -0.18 | 0.12 | 0.37  | 0.39  | -0.33 |
|         | <i>Chironomus nippodorsalis</i>  | -0.20 | -0.03 | 0.18  | -0.18 | -0.13 | 0.13 | 0.34  | 0.37  | -0.15 |
|         | <i>Chironomus tepperi</i>        | -0.18 | -0.01 | 0.19  | -0.18 | -0.12 | 0.14 | 0.37  | 0.36  | -0.43 |
|         | <i>Chironomus claggi</i>         | -0.18 | -0.01 | 0.22  | -0.18 | -0.13 | 0.06 | -0.36 | -0.35 | -0.31 |

|  |                                  |       |       |      |       |       |      |      |      |       |
|--|----------------------------------|-------|-------|------|-------|-------|------|------|------|-------|
|  | <i>Chironomus kiiensis</i>       | -0.17 | -0.02 | 0.15 | -0.10 | -0.13 | 0.13 | 0.35 | 0.35 | -0.25 |
|  | <i>Chironomus transvaalensis</i> | -0.17 | 0.01  | 0.22 | -0.18 | -0.03 | 0.15 | 0.35 | 0.36 | -0.14 |
|  | <i>Chironomus circumdatus</i>    | -0.18 | 0.01  | 0.22 | -0.18 | -0.03 | 0.14 | 0.36 | 0.38 | -0.41 |
|  | <i>Chironomus javanus</i>        | -0.19 | -0.01 | 0.18 | -0.17 | -0.08 | 0.15 | 0.37 | 0.34 | -0.36 |

**Table S3 Start and stop codons of 13 PCGs in the mitogenomes of 15 *Chironomus* species.**

| Feature                          | Start/Stop codon |             |             |             |             |             |             |             |             |             |                        |             |             |
|----------------------------------|------------------|-------------|-------------|-------------|-------------|-------------|-------------|-------------|-------------|-------------|------------------------|-------------|-------------|
|                                  | <i>ATP8</i>      | <i>ATP6</i> | <i>COI</i>  | <i>CO2</i>  | <i>CO3</i>  | <i>CytB</i> | <i>ND1</i>  | <i>ND2</i>  | <i>ND3</i>  | <i>ND4</i>  | <i>ND4</i><br><i>L</i> | <i>ND5</i>  | <i>ND6</i>  |
| <i>Chironomus tepperi</i>        | ATC/<br>TAA      | ATG/<br>TAA | TTG/<br>TAG | ATG/<br>TAA | ATG/<br>TAA | ATG/<br>TAA | ATT/<br>TAA | ATT/<br>TAA | ATT/<br>TAA | ATG/<br>TAA | ATG/<br>TAA            | GTG/<br>TAA | ATT/<br>TAA |
| <i>Chironomus flaviplumus</i>    | ATT/<br>TAA      | ATG/<br>TAA | ATA/<br>TAA | ATG/<br>TAA | ATG/<br>TAA | ATG/<br>TAG | ATT/<br>TAA | ATT/<br>TAA | ATT/<br>TAA | ATG/<br>TAA | ATG/<br>TAA            | GTG/<br>TAA | ATT/<br>TAA |
| <i>Chironomus kiiensis</i>       | ATC/<br>TAA      | ATG/<br>TAA | TTG/<br>TAA | ATG/<br>TAA | ATG/<br>TAA | ATG/<br>TAA | ATT/<br>TAA | ATT/<br>TAA | ATT/<br>TAA | ATG/<br>TAG | ATG/<br>TAA            | GTG/<br>TAA | ATT/<br>TAA |
| <i>Chironomus transvaalensis</i> | ATT/<br>TAA      | ATG/<br>TAA | TTG/<br>TAA | ATG/<br>TAA | ATG/<br>TAA | ATG/<br>TAA | TTG/<br>TAA | ATT/<br>TAA | ATT/<br>TAA | ATG/<br>TAA | ATG/<br>TAA            | GTG/<br>TAA | ATT/<br>TAA |
| <i>Chironomus circumdatus</i>    | ATC/<br>TAA      | ATG/<br>TAA | TTG/<br>TAA | ATG/<br>TAA | ATG/<br>TAA | ATG/<br>TAA | TTG/<br>TAA | ATT/<br>TAA | ATT/<br>TAA | ATG/<br>TAA | ATG/<br>TAA            | GTG/<br>TAA | ATT/<br>TAA |
| <i>Chironomus javanus</i>        | ATT/<br>TAA      | ATG/<br>TAA | TTG/<br>TAA | ATG/<br>TAA | ATG/<br>TAA | ATG/<br>TAA | TTG/<br>TAA | ATT/<br>TAA | ATT/<br>TAA | ATG/<br>TAG | ATG/<br>TAA            | GTG/<br>TAA | ATT/<br>TAA |
| <i>Chironomus anthracinus</i>    | ATC/<br>TAA      | ATG/<br>TAA | TTG/<br>TAA | ATG/<br>TAA | ATG/<br>TAA | ATG/<br>TAA | TTG/<br>TAA | ATT/<br>TAA | ATT/<br>TAA | ATG/<br>TAG | ATG/<br>TAA            | GTG/<br>TAA | ATT/<br>TAA |
| <i>Chironomus nipponensis</i>    | ATT/<br>TAA      | ATG/<br>TAA | TTG/<br>TAA | ATG/<br>TAA | ATG/<br>TAA | ATG/<br>TAA | TTG/<br>TAA | ATT/<br>TA- | ATT/<br>TAA | ATG/<br>TAG | ATG/<br>TAA            | GTG/<br>TAA | ATT/<br>TAA |
| <i>Chironomus claggi</i>         | ATT/<br>TAA      | ATG/<br>TAA | TTG/<br>TAA | ATG/<br>TAA | ATG/<br>TAA | ATG/<br>TAA | TTG/<br>TAA | ATT/<br>TAA | ATT/<br>TAA | ATG/<br>TAA | ATG/<br>TAA            | GTG/<br>TAA | ATT/<br>TAA |
| <i>Chironomus plumosus</i>       | ATT/<br>TAA      | ATG/<br>TAA | TTG/<br>TAA | ATG/<br>TAA | ATG/<br>TAA | ATG/<br>TAA | TTG/<br>TAA | ATT/<br>TAA | ATT/<br>TAA | ATG/<br>TAA | ATG/<br>TAA            | GTG/<br>TAA | ATT/<br>TAA |
| <i>Chironomus tentans</i>        | ATT/<br>TAA      | ATG/<br>TAA | TTG/<br>TAA | ATG/<br>TAA | ATG/<br>TAA | ATG/<br>TAA | TTG/<br>TAA | ATT/<br>TAA | ATT/<br>TAA | ATG/<br>TAA | ATG/<br>TAA            | GTG/<br>TAA | ATT/<br>TAA |
| <i>Chironomus novosibiricus</i>  | ATC/<br>TAA      | ATG/<br>TAA | TTG/<br>TAA | ATG/<br>TAA | ATG/<br>TAG | ATG/<br>TAA | TTG/<br>TAA | ATT/<br>TAA | ATT/<br>TAA | ATG/<br>TAA | ATG/<br>TAA            | GTG/<br>TAA | ATT/<br>TAA |
| <i>Chironomus annularius</i>     | ATC/<br>TAA      | ATG/<br>TAA | TTG/<br>TAA | ATG/<br>TAA | ATG/<br>TAA | ATG/<br>TAA | TTG/<br>TAA | ATT/<br>TAA | ATT/<br>TAA | ATG/<br>TAA | ATG/<br>TAA            | GTG/<br>TAA | ATT/<br>TAA |

|                                |             |             |             |             |             |             |             |             |             |             |             |             |             |
|--------------------------------|-------------|-------------|-------------|-------------|-------------|-------------|-------------|-------------|-------------|-------------|-------------|-------------|-------------|
| <i>Chironomus agilis</i>       | ATT/<br>TAA | ATG/<br>TAA | TTG/<br>TAA | ATG/<br>TAA | ATG/<br>TAA | ATG/<br>TAA | TTG/<br>TAA | ATT/<br>TAA | ATT/<br>TAA | ATG/<br>TAA | ATG/<br>TAA | GTG/<br>TAA | ATT/<br>TAA |
| <i>Chironomus nipodorsalis</i> | ATT/<br>TAA | ATG/<br>TAA | TTG/<br>TAA | ATG/<br>TAA | ATG/<br>TAA | ATG/<br>TAA | TTG/<br>TAA | ATT/<br>TAA | ATT/<br>TAA | ATG/<br>TAA | ATG/<br>TAA | GTG/<br>TAA | ATT/<br>TAA |

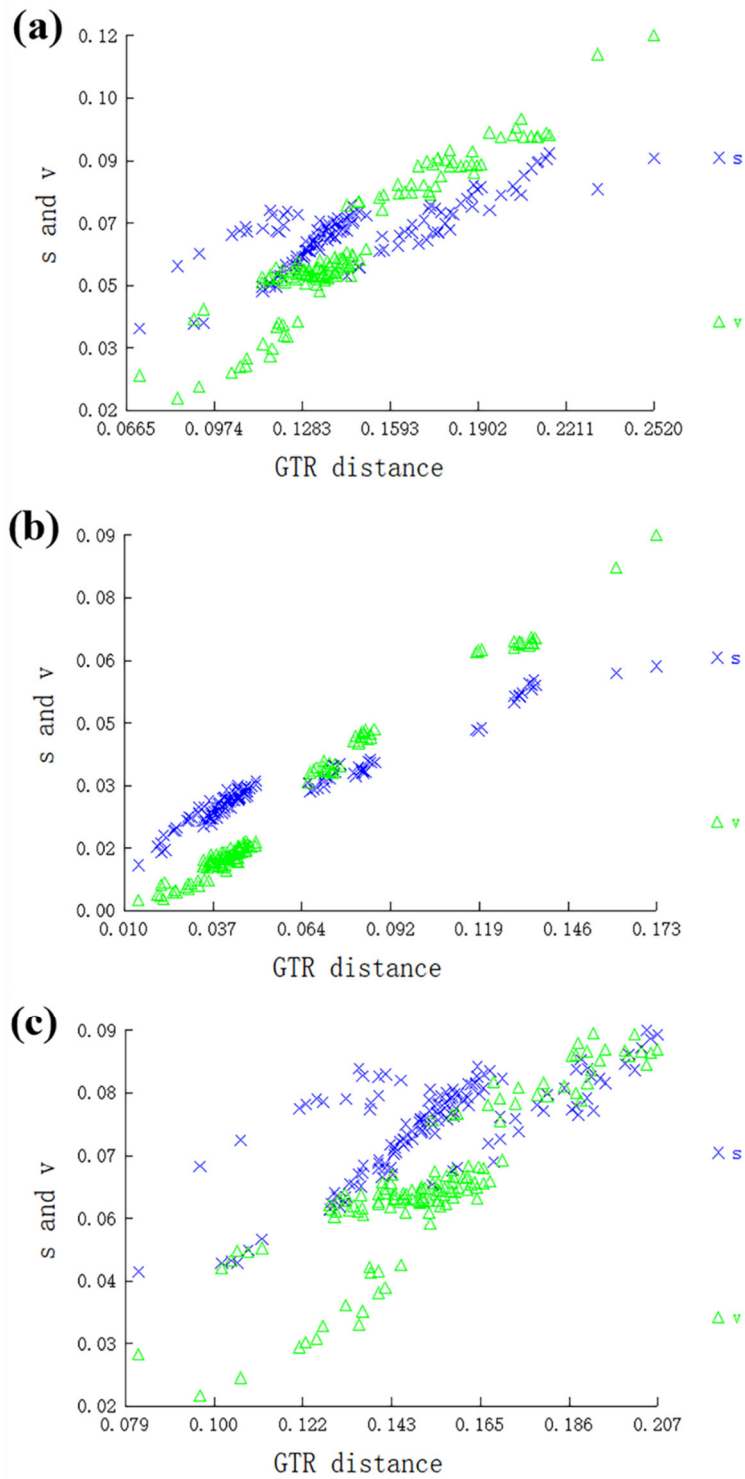

**Figure S1.** Substitution patterns of the PCG123R (a), PCG12R (b) and PCG123 (c) datasets. The graphs represent the increase in GTR distance.

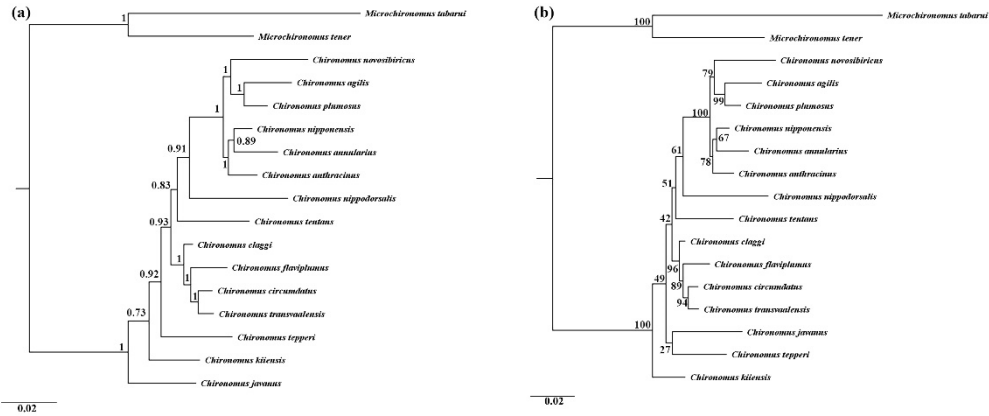

**Figure S2.** Phylogenetic trees of *Chironomus* inferred from the AA dataset. (a) BI tree. Numbers at the nodes are BI posterior probabilities. (b) ML tree. Numbers at the nodes are ML bootstrap values.

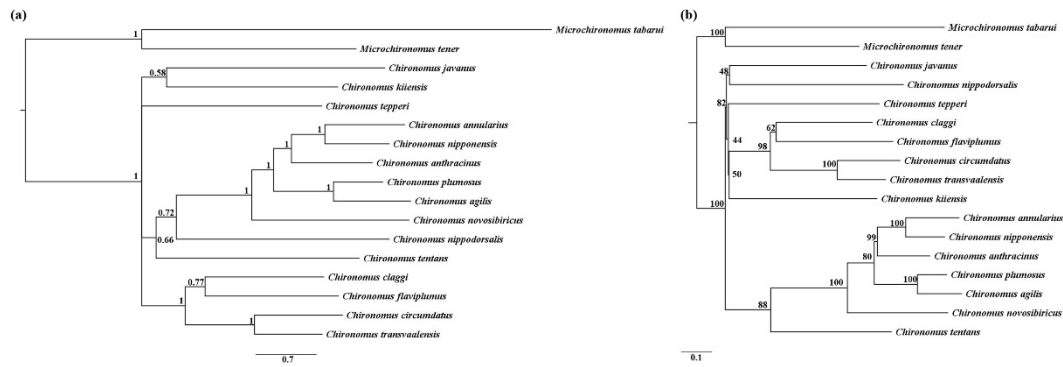

**Figure S3.** Phylogenetic trees of *Chironomus* inferred from the PCG123 dataset. (a) BI tree. Numbers at the nodes are BI posterior probabilities. (b) ML tree. Numbers at the nodes are ML bootstrap values.

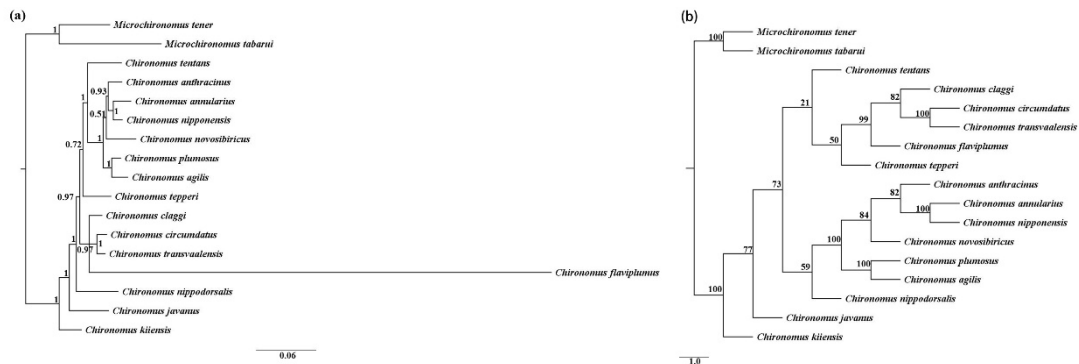

**Figure S4.** Phylogenetic trees of *Chironomus* inferred from the PCG12R dataset. (a) BI tree. Numbers at the nodes are BI posterior probabilities. (b) ML tree. Numbers at the nodes are ML bootstrap values.
